# Supplementary material for: The Functions of Atrial Strands Interdigitating with and Penetrating into Sinoatrial Node: A Theoretical Study of the Problem
Source: PLoS One. 2015 Mar 24;10(3):e0118623. doi: 10.1371/journal.pone.0118623 (PMC4372425; doi:10.1371/journal.pone.0118623)
Supplement: S1 Text — (DOC) [file pone.0118623.s001.doc]

**Supporting information**

We performed simulations using the Earm-Hilgemann-Noble (EHN) atrial cell model and repeated the simulations shown in Figure 4 and Figure 6A in the paper. The figure compares the results of using the both models.

The parameters of the EHN model are the same as the original ones on <http://www.cellml.org/> (also see Winslow RL et al. (1993) Generation and propagation of ectopic beats induced by spatially localized Na-K pump inhibition in atrial network models. Proc. R. Soc. Lond. B 254: 55-61). The coupling parameters of Gss, Gs,as, Gsa and Gaa are identical to those used for the LR1 model, except that In panel B Gsa is reduced to 8nS to block conduction via the peripheral SAN to estimate the threshold Gs,as (10 ns was used for the LR1 model). The reason is that the EHN model is more excitable than the LR1 model.


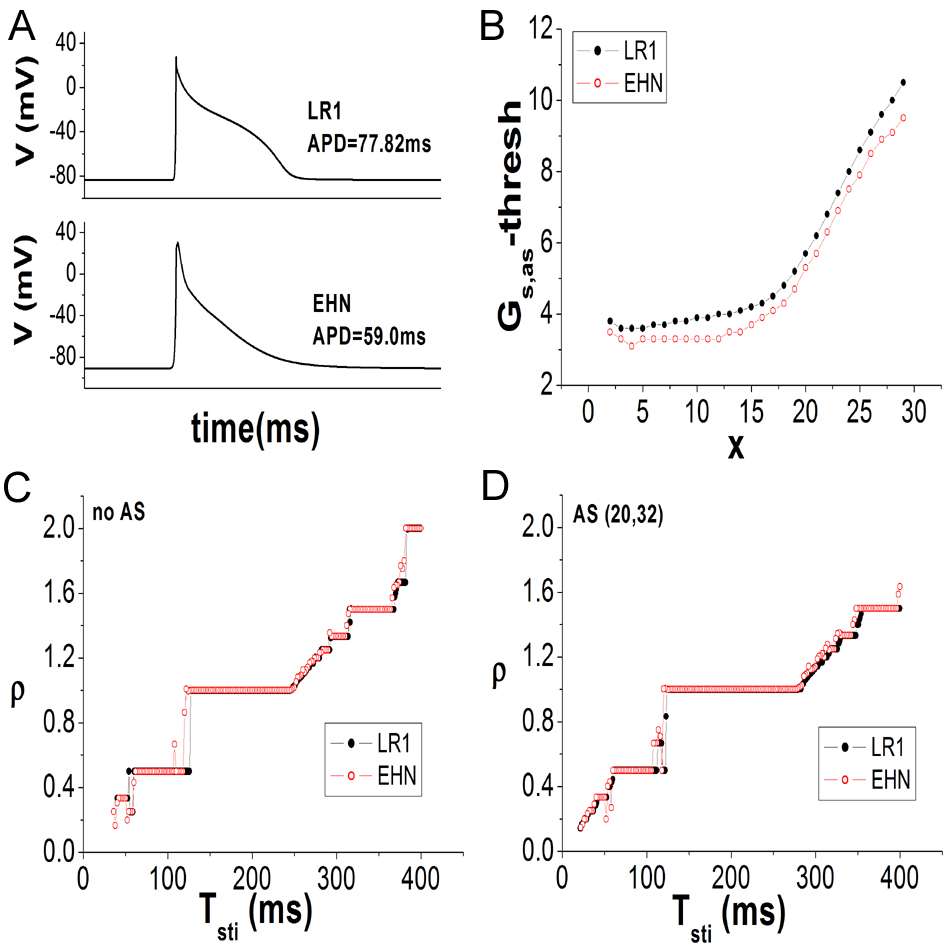


Panel A shows the action potentials of the two models, which are measured from a cell in tissue under identical pacing rate of SAN. Panel B shows the threshold Gs,as. The values of the EHN model is a little bit smaller than that of the LR1 model because of different excitability of the models. Panels C and D are the devil’s stairs of the systems without AS and with AS (20,32), respectively. Under the same conditions, the phase-locking regions of the two models coincide well with each other.
